Development 136, 2309 (2009) doi:10.1242/dev.040022

***Drosophila ptip* is essential for anterior/posterior patterning in development and interacts with the PcG and trxG pathways**

**Ming Fang, Hongyan Ren, Jiabin Liu, Ken M. Cadigan, Sanjeevkumar R. Patel and Gregory R. Dressler**

There was an error published in *Development* **136**, 1929-1938.

The address for author affiliation 2 is incomplete. The corrected address appears below.

The authors apologise to readers for this mistake.

Department of Genetics and Developmental Biology, Southeast University Medical School, The Key Laboratory of Developmental Genes and Human Disease, Ministry of Education, Nanjing 210009, China.
